# Supplementary material for: Two-phase electrodriven membrane extraction combined with liquid chromatography for the determination of tricyclic antidepressants in aqueous matrices
Source: Royal Society of Chemistry journal article supplement (doi:10.1039/c4ay01700e), 2014-01-01
Supplement: c4ay01700e1.pdf [file c4ay01700e1.pdf]

**Supplementary data #1**

**Table:** Molecular structures formula, dissociation constant and partition coefficients of TCAs drugs studied.

| Analyte(s)            | Structure                                                                           | Molecular formula    | $pK_a$            | Log P            |
|-----------------------|-------------------------------------------------------------------------------------|----------------------|-------------------|------------------|
| Imipramine (IMI)      | 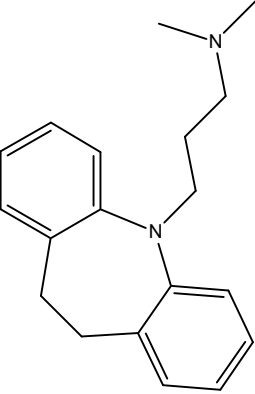   | $C_{19}H_{24}N_2$    | 9.53 <sup>a</sup> | 4.5 <sup>a</sup> |
| Amitriptyline (AMI)   |   | $C_{20}H_{23}N$      | 9.42 <sup>a</sup> | 4.9 <sup>a</sup> |
| Chlorpromazine (CHLO) |  | $C_{17}H_{19}ClN_2S$ | 9.20 <sup>a</sup> | 5.2 <sup>a</sup> |

<sup>a</sup> <http://www.drugbank.ca> (accessed on 12 March 2014).
