# Supplementary material for: Two-phase electrodriven membrane extraction combined with liquid chromatography for the determination of tricyclic antidepressants in aqueous matrices
Source: Royal Society of Chemistry journal article supplement (doi:10.1039/c4ay01700e), 2014-01-01
Supplement: c4ay01700e2.pdf [file c4ay01700e2.pdf]

**Supplementary data #2**

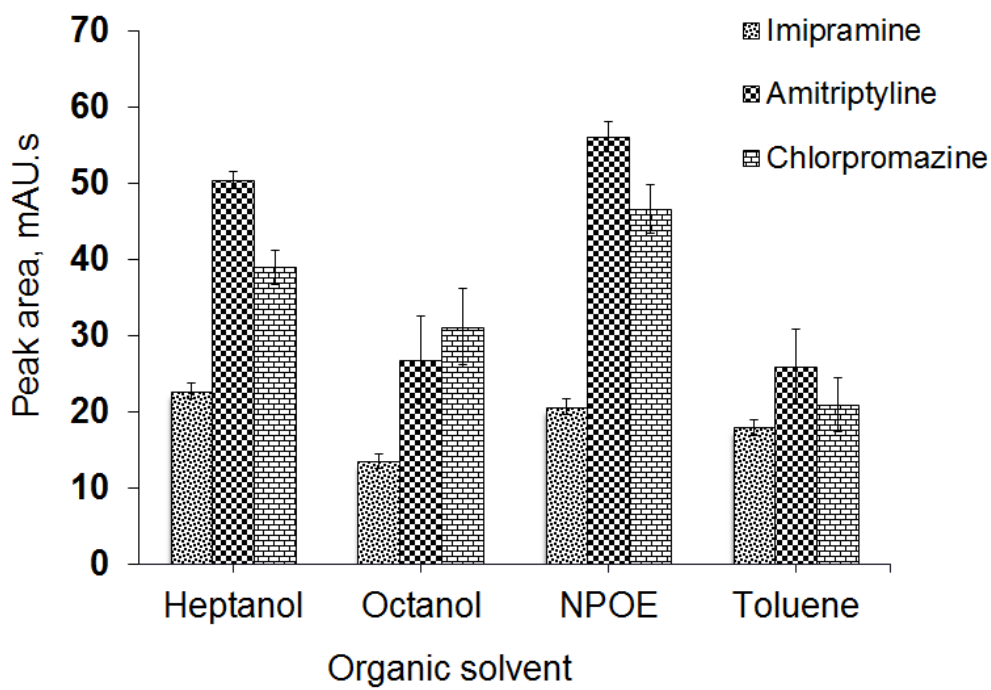

**Supplementary Figure:** Effect of organic solvent extraction efficiency: spiked concentration:  $1.0 \mu\text{g mL}^{-1}$  of analyte, organic solvent: 1-octanol, pH of sample solution: 3, applied voltage: 50 V, extraction time: 15 min, and stirring rate: 1050 rpm.
